# Supplementary material
Source: PubMed Central journal article supplement (PMC7544677)

**Figure 1**

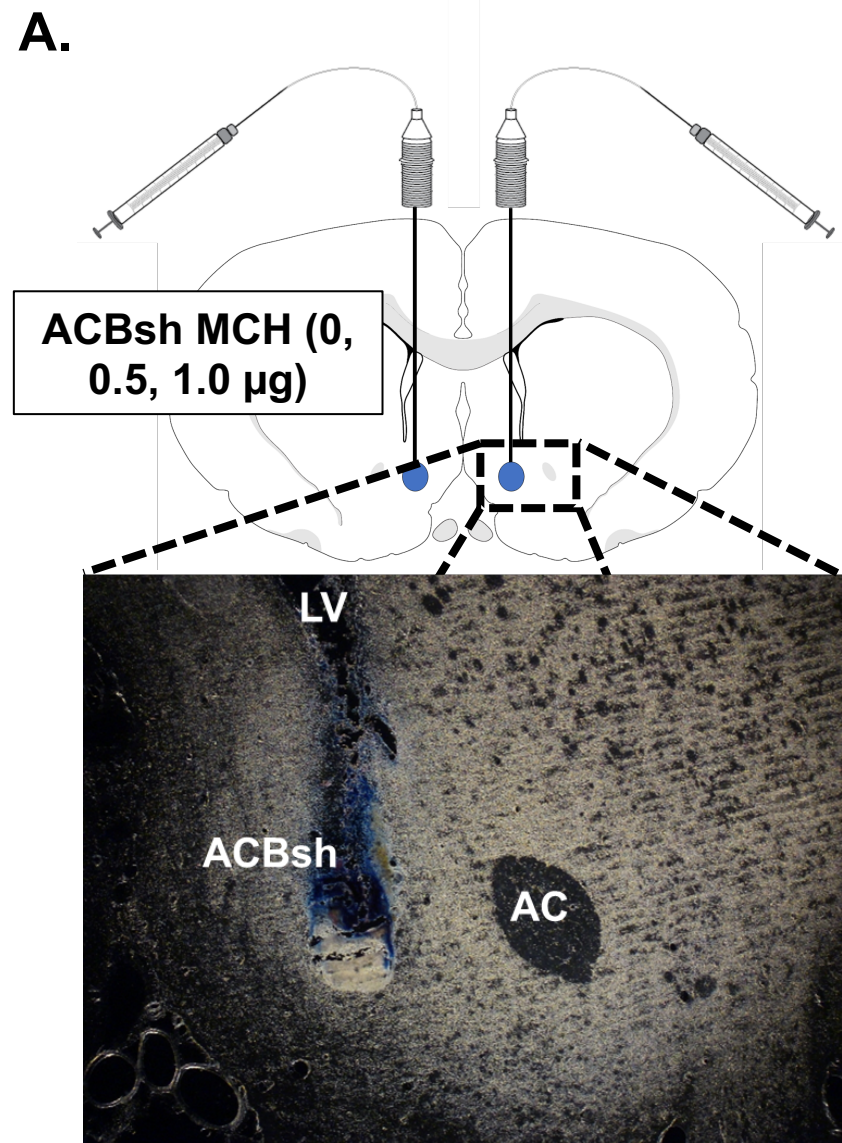

**B. Males**  
Dark Cycle Chow Intake

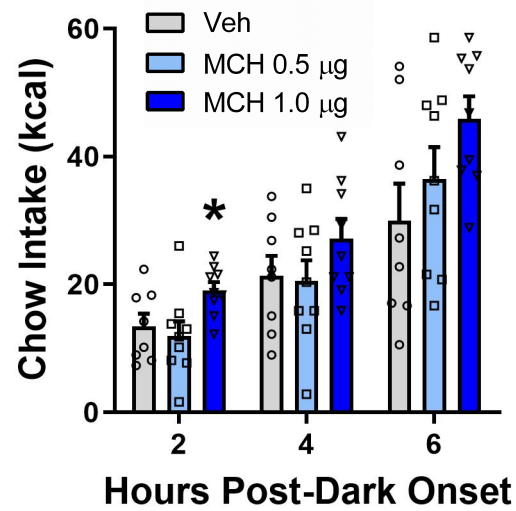

**C.** Light Cycle Chow Intake

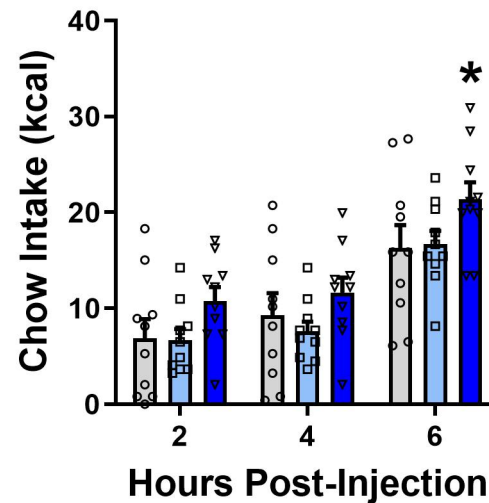

**D.** Light Cycle Sucrose Intake

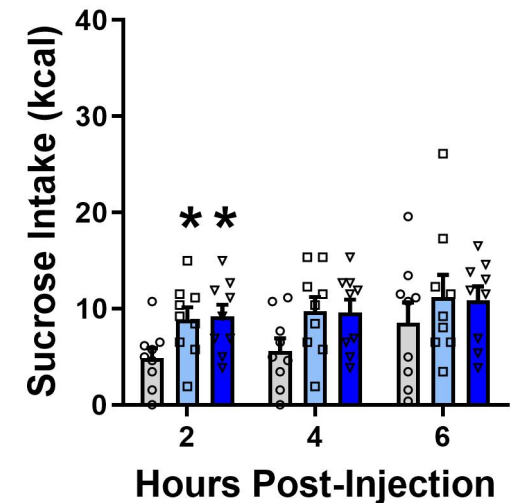

**E. Females**  
Dark Cycle Chow Intake

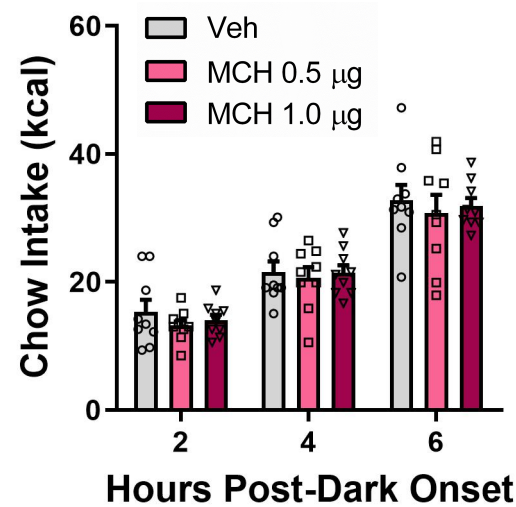

**F.** Light Cycle Chow Intake

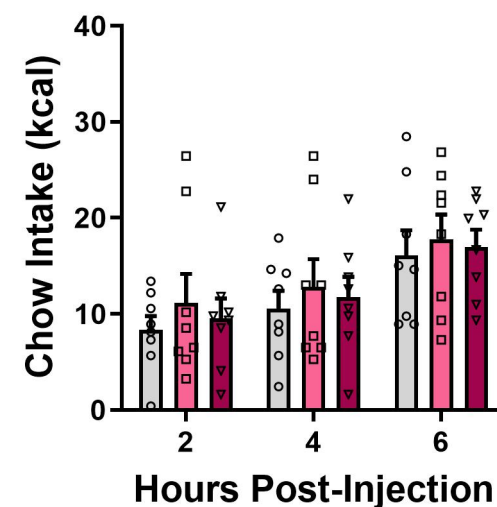

**G.** Light Cycle Sucrose Intake

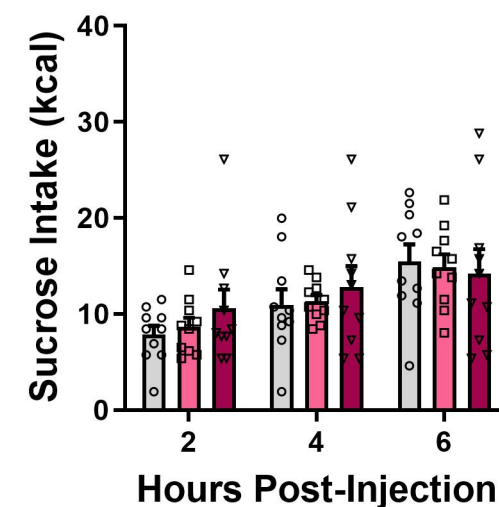

Supplement: NIHMS1622008-supplement-1.pdf [file NIHMS1622008-supplement-1.pdf]
