# Supplementary material
Source: PubMed Central journal article supplement (PMC7544677)

**Figure 4**

**A. PROG sucrose / chow choice test**

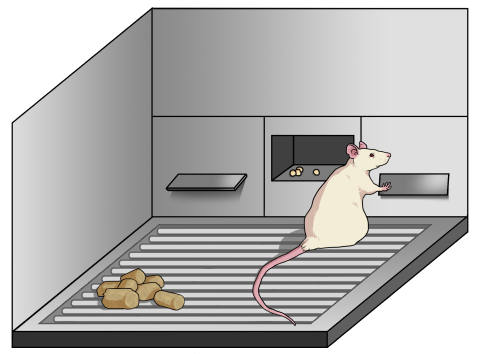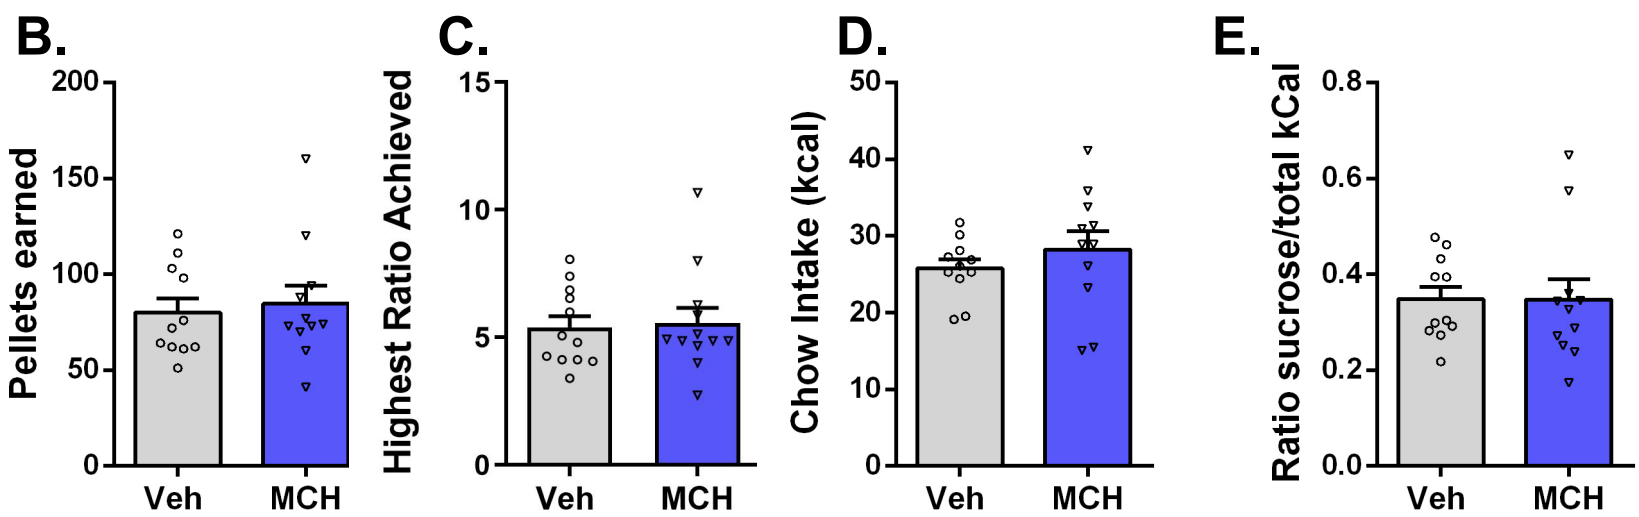

**F. Males Open Field Test**

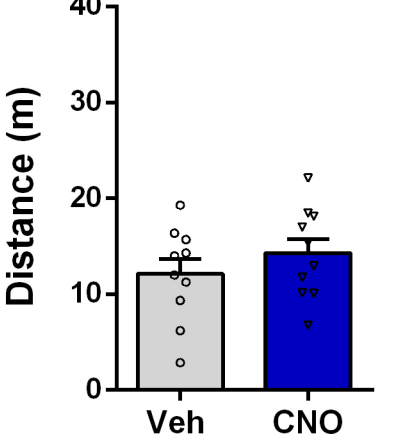

**G. Center zone: entries**

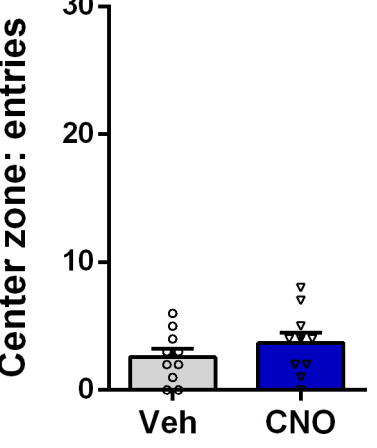

**H. Center zone: time (s)**

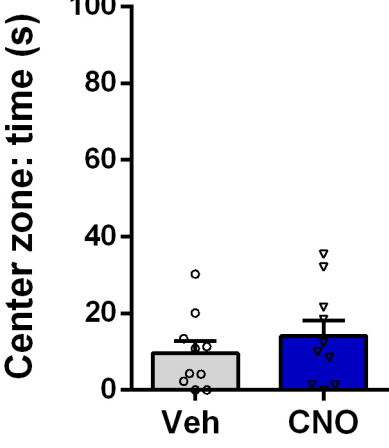

**I. Periphery: entries**

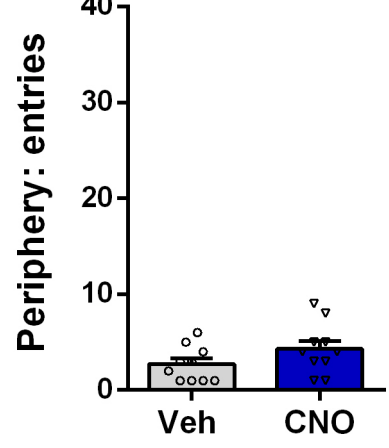

**J. Periphery: time (s)**

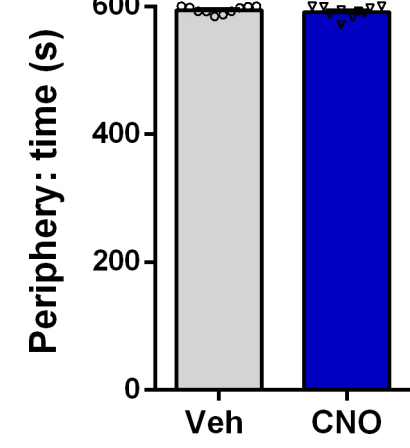

**K. Females Open Field Test**

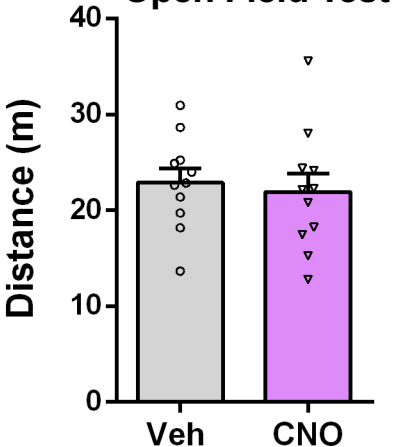

**L. Center zone: entries**

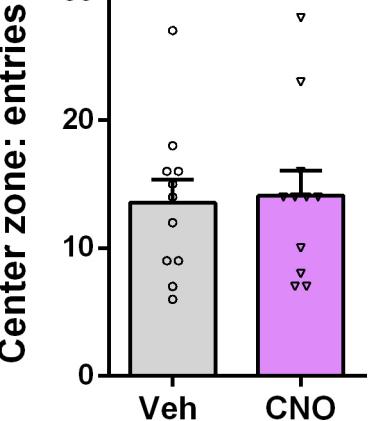

**M. Center zone: time (s)**

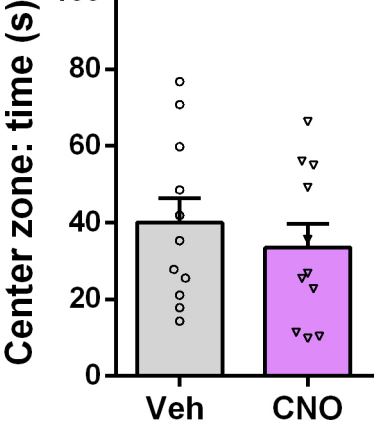

**N. Periphery: entries**

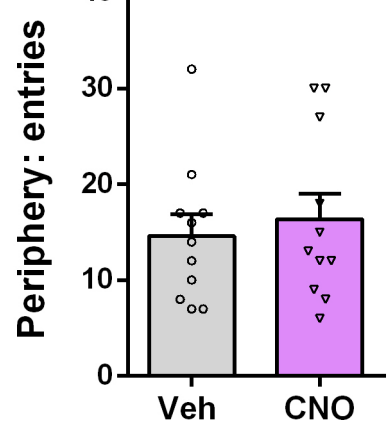

**O. Periphery: time (s)**

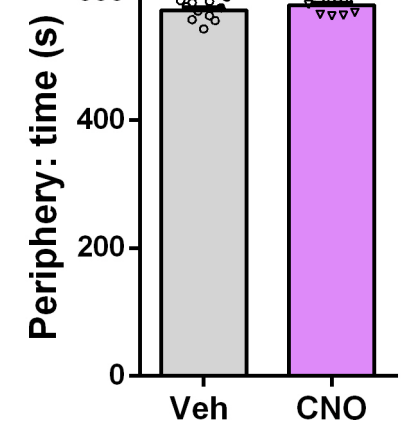

Supplement: NIHMS1622008-supplement-4.pdf [file NIHMS1622008-supplement-4.pdf]
