# Supplementary material
Source: PubMed Central journal article supplement (PMC7544677)

# Supplemental Figure 1

## A. Males

### Dark Cycle Chow Intake

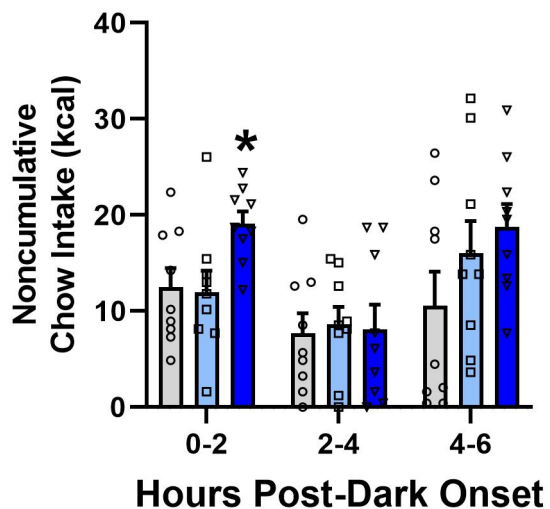

## B.

### Light Cycle Chow Intake

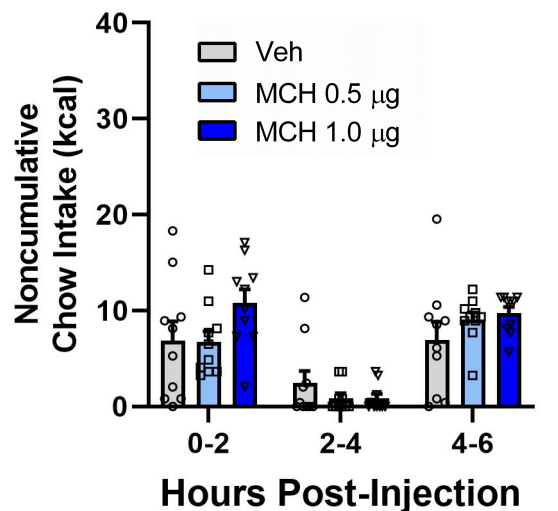

## C.

### Light Cycle Sucrose Intake

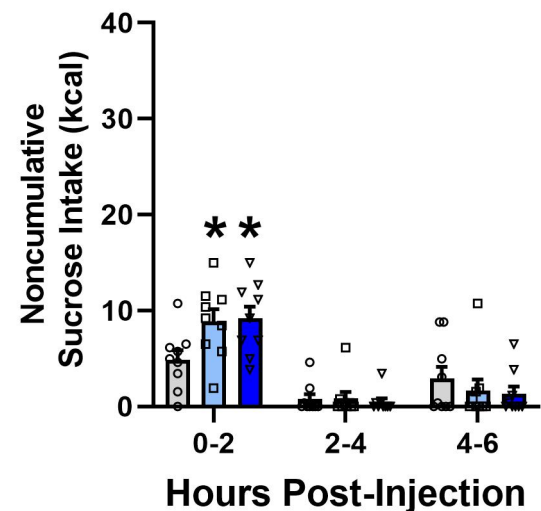

## D. Females

### Dark Cycle Chow Intake

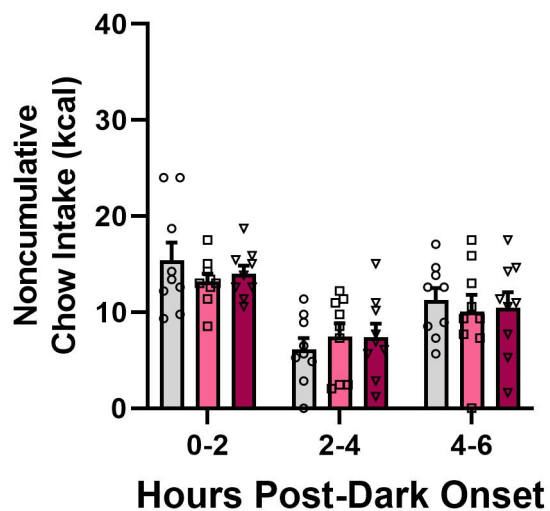

## E.

### Light Cycle Chow Intake

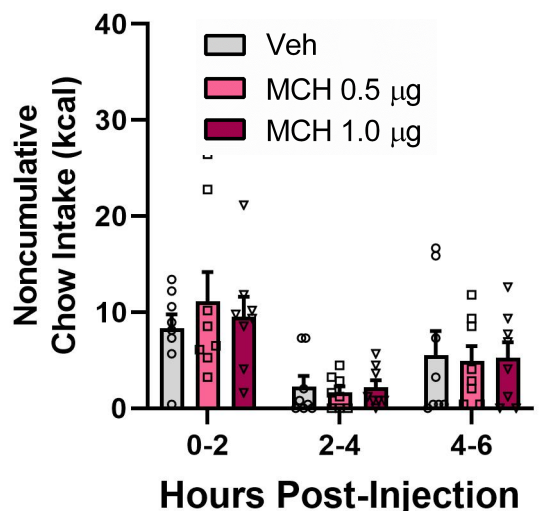

## F.

### Light Cycle Sucrose Intake

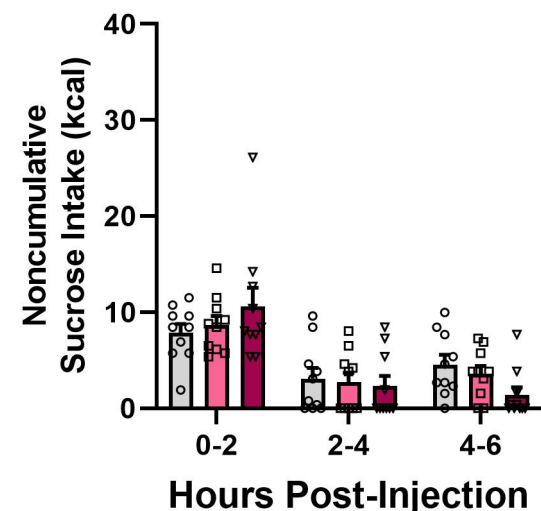

Supplement: NIHMS1622008-supplement-5.pdf [file NIHMS1622008-supplement-5.pdf]
