# Supplementary material
Source: PubMed Central journal article supplement (PMC7544677)

**Figure 2**

**A.**

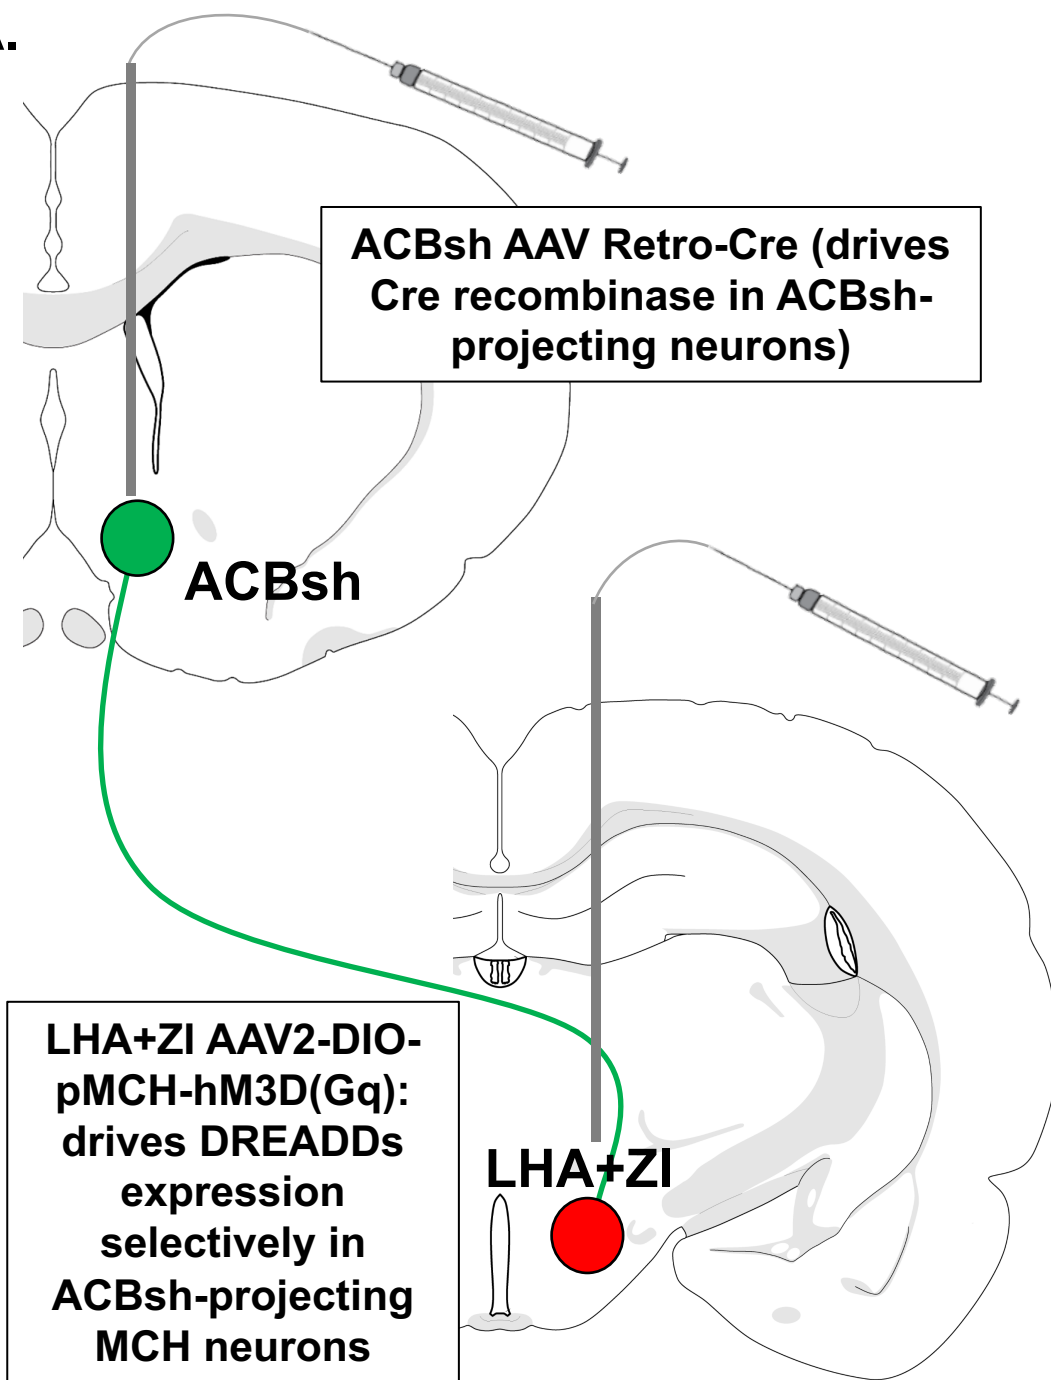

**B.**

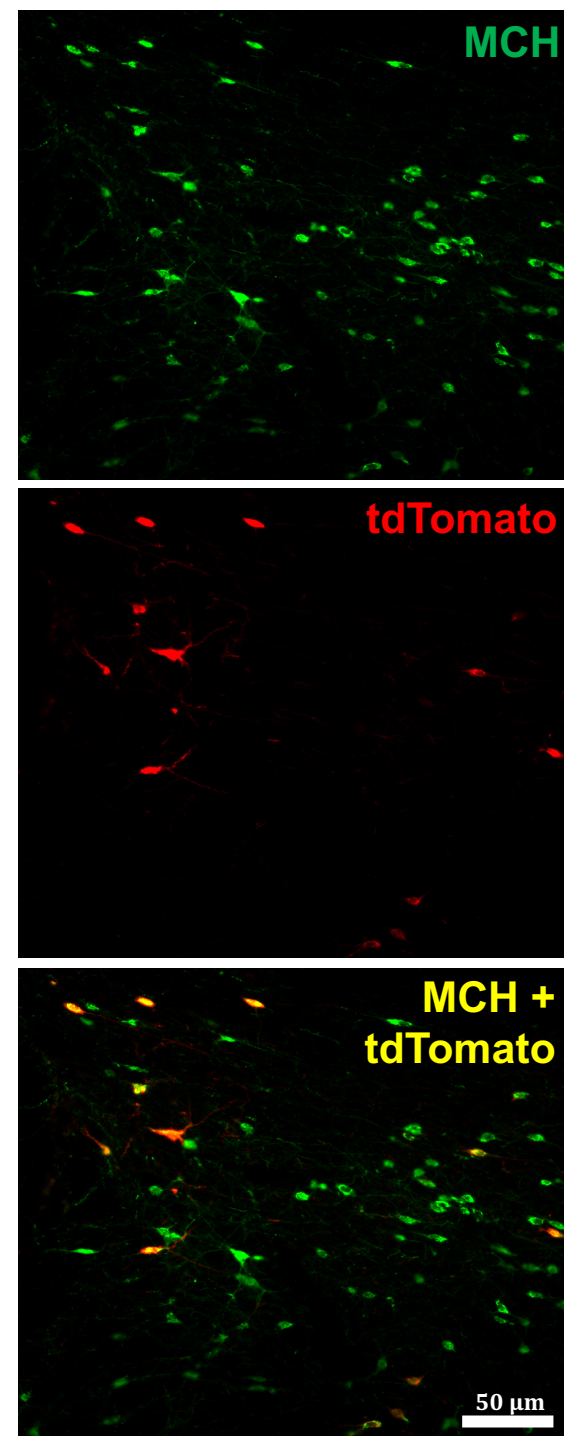

Supplement: NIHMS1622008-supplement-2.pdf [file NIHMS1622008-supplement-2.pdf]

**Figure 3**

**A. Males**

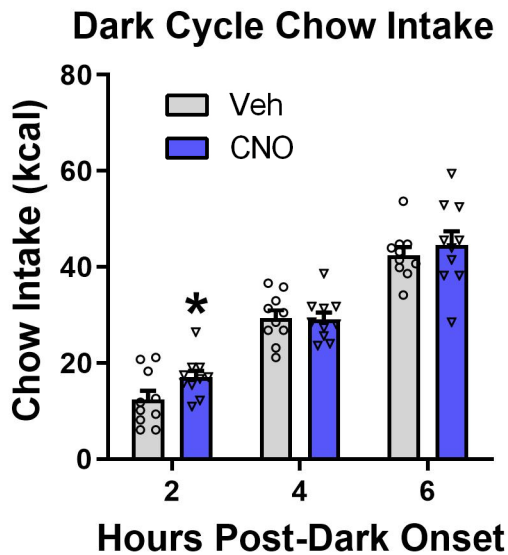

**B.**

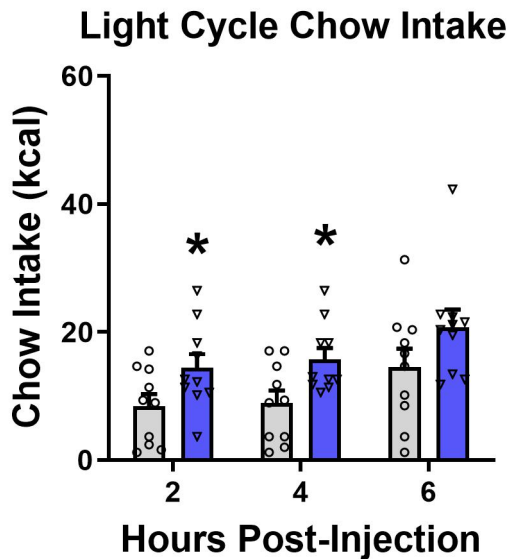

**C.**

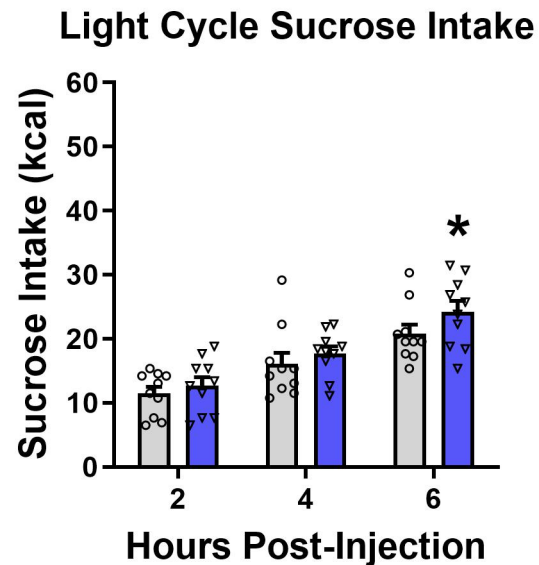

**D. Females**

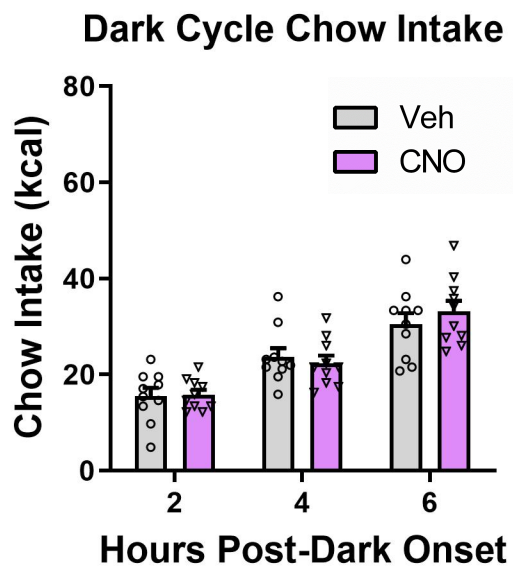

**E.**

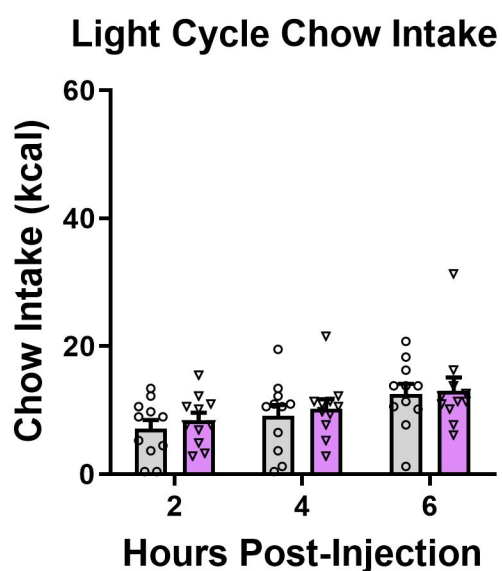

**F.**

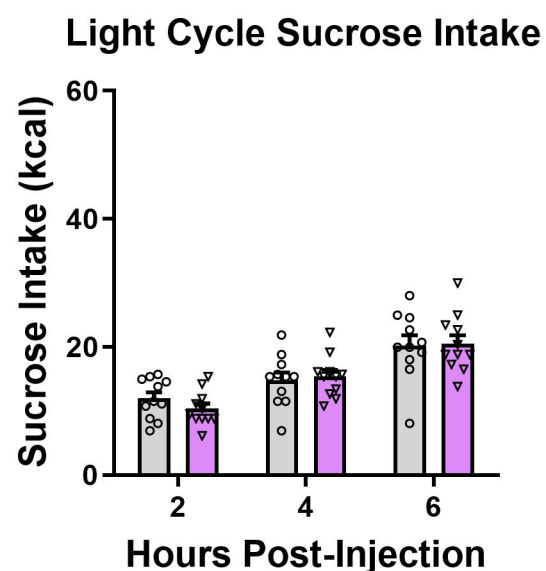

Supplement: NIHMS1622008-supplement-3.pdf [file NIHMS1622008-supplement-3.pdf]

# Supplemental Figure 3

## A. Males

### Dark Cycle Chow Intake

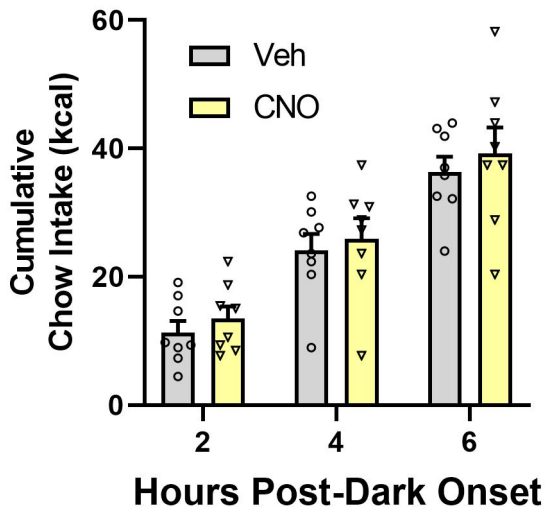

## B.

### Dark Cycle Chow Intake

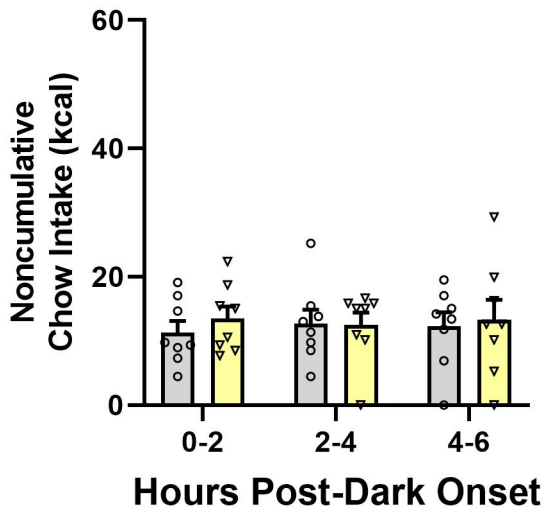

Supplement: NIHMS1622008-supplement-7.pdf [file NIHMS1622008-supplement-7.pdf]

# Supplemental Figure 4

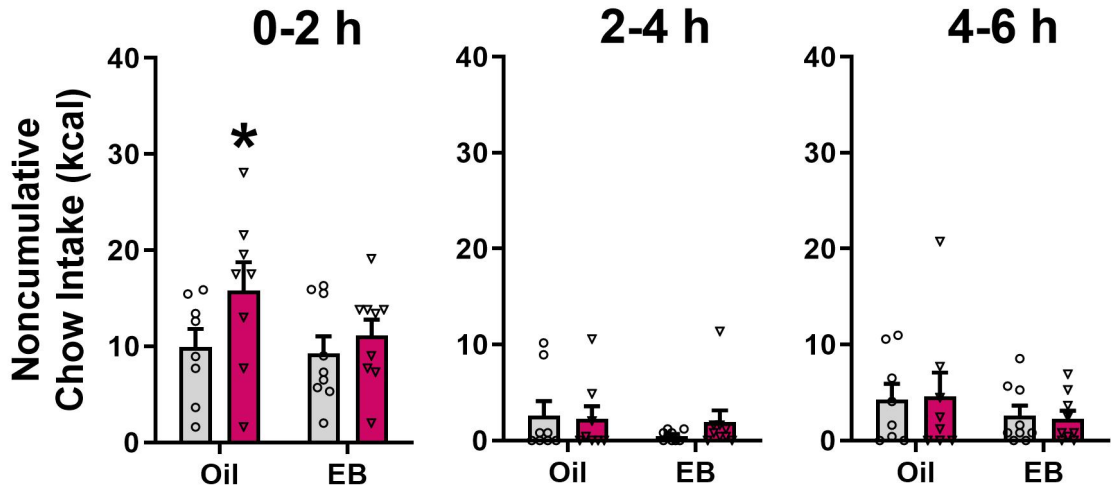

Supplement: NIHMS1622008-supplement-8.pdf [file NIHMS1622008-supplement-8.pdf]
